# Supplementary figures and images for: Length–Weight Relationships, Growth Models of Two Croakers (Pennahia macrocephalus and Atrobucca nibe) off Taiwan and Growth Performance Indices of Related Species
Source: MDPI journal article supplement (doi:10.3390/fishes7050281), 2022-10-11

***P. macrocephalus***

**Sagitta**

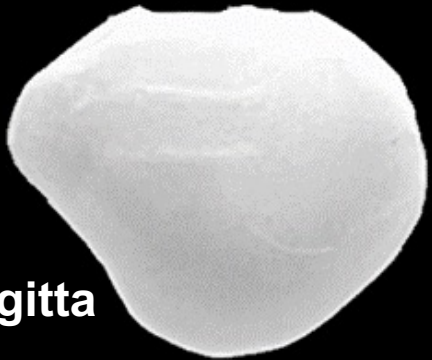

**Lapillus**

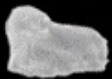

**Asteriscus**

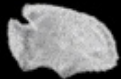

***A. nibe***

**Sagitta**

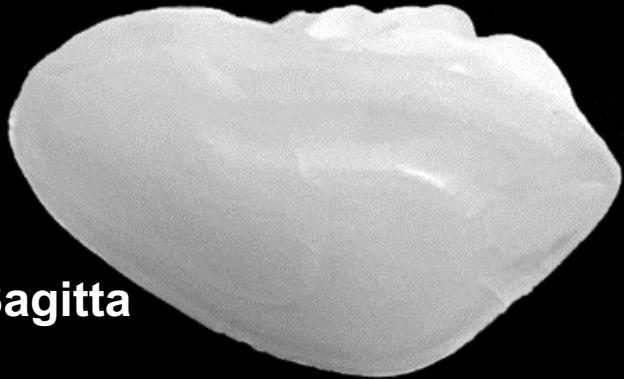

**Lapillus**

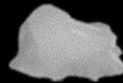

**Asteriscus**

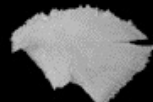

Supplement: s1 [file s1]
